# **Household socio-economic status and likelihood of HIV infection among under five-year children in Muheza district, north-eastern Tanzania**

**Veneranda M. Bwana<sup>1,2\*</sup>, Edgar Simulundu<sup>3</sup>, Leonard E.G. Mboera<sup>4</sup>, Sayoki G. Mfinanga<sup>5,6</sup>, Charles Michelo<sup>1,7</sup>**

<sup>1</sup>University of Zambia, School of Public Health, Lusaka, Zambia

<sup>2</sup>National Institute for Medical Research, Amani Research Centre, Muheza, Tanzania

<sup>3</sup>University of Zambia, School of Veterinary Medicine, Department of Disease Control, Lusaka, Zambia

<sup>4</sup>SACIDS Foundation for One Health, Sokoine University of Agriculture, Morogoro, Tanzania

<sup>5</sup>National Institute for Medical Research, Muhimbili Research Centre, Dar es Salaam, Tanzania

<sup>6</sup>Muhimbili University of Health and Allied Sciences, Dar es Salaam, Tanzania

<sup>7</sup>Strategic Centre for Health Systems Metrics & Evaluations, School of Public Health, University of Zambia, Lusaka, Zambia

## **Emails**

VMB: [vbwana@gmail.com](mailto:vbwana@gmail.com)

ES: [esikabala@yahoo.com](mailto:esikabala@yahoo.com)

SGM: [gsmfinanga@yahoo.com](mailto:gsmfinanga@yahoo.com)

LEGM: [lmboera@gmail.com](mailto:lmboera@gmail.com)

CM: [ccmichelo@yahoo.com](mailto:ccmichelo@yahoo.com)

**\*Corresponding author:** Dr. Veneranda M. Bwana, National Institute for Medical Research, Amani Research Centre, P.O. Box 81, Muheza, Tanzania; E-mail: [vbwana@gmail.com](mailto:vbwana@gmail.com)  
Telephone: +255 767506872

# Abstract

**Background:** There are evidences of the association between socio-economic factors and HIV prevalence in Sub-Saharan Africa. However, there is dearth of information on such relationship in Tanzania. Here, we present data on the relationship between household's socio-economic factors and HIV prevalence among under five-year children in Muheza district, Tanzania.

**Methods:** We conducted a facility-based study from June 2015 to June 2016 in which we enrolled under five-year children born to HIV positive mothers. Information on HIV status of the child and socio-demographic characteristic of the head of the household was collected using a structured questionnaire. Data analysis was done using STATA version 13.0.

**Results:** A total of 576 mothers/guardians were interviewed each with respective HIV exposed under five-year child. Children who belonged to a head of household with at least a high education level (AOR= 0.4, 95% CI 0.2-0.8) and living in a relatively wealthy household (AOR = 0.5, 95% CI 0.2-0.9) was associated with reduced odds of HIV infection among children. Univariate analysis revealed that the odds of HIV infection was three-fold (COR = 2.9, 95% CI 1.2-7.0) higher among children living in rural than in urban areas. The heads of household living in rural areas (AOR=0.3 95% CI 0.1-0.9) had low education level compared to those living in urban areas.

**Conclusion:** Children who belong to the head of households with high educational level, high household wealth were associated with reduced likelihood of HIV infection in Tanzania. Children living in rural areas had increased likelihood of acquiring HIV infection. These findings stress the need to focus on improving education status of the population and economically disadvantaged populations as a strategy for HIV prevention and control measures.

**Keywords: socio-economic, education, household, children, HIV, Tanzania**

# Introduction

By the end of 2016, Sub-Saharan Africa had the highest burden of paediatric HIV with over 90% of the estimated 2.1 million children living with HIV worldwide [2]. Tanzania is one of the countries in Sub-Saharan Africa most devastated by this global pandemic. In 2016, estimated 1.4 million people in Tanzania were living with HIV and 18% of these infections were due to mother to child transmission (MTCT) [3]. Maternal immunological status with a Cluster of Differentiation 4 (CD4) cell count less than 200 cell per mm<sup>3</sup> near delivery, high maternal viral load, advanced stage of maternal HIV infection have been observed to increase the risk of MTCT [4, 5]. These risk factors operates through socio-economic statuses such as occupation, marital status, education and income to bring a health outcome among children [6, 7].

Studies have indicated that higher education attainment is a proxy for higher socio-economic status which is an indication of increased wealth [8]. It has been argued that in early HIV epidemic, higher education achievement was associated with higher wealth, and increased mobility that potentially increases exposure to HIV infection [9]. However, as the epidemic matures the pattern shifts towards reduced risk among the wealthy and higher educated individuals [10-12]. Whilst HIV has been classified as the disease of the poor, the causality of which one cause the other between poverty and HIV is complex and challenging [13, 14]. Over the recent years, the burden of HIV has been reported to be greater among the poorer and least educated populations [11, 15, 16]. This is likely to be due to their engagement in risky sexual behaviours and transactional sexual relationships and limited access to health facilities [17].

According to the World Bank report, it has been observed that improved education leads to poverty reduction, boosts economic growth and increases income [18]. Countries with high HIV/AIDS burden are continuously stressing the need to put the goal for universal education for all as an important Sustainable Development Goal as well as a strategy for combating the HIV/AIDS epidemic [19-22]. In countries with mature HIV epidemics, whereby HIV/AIDS education programmes have been introduced, high education attainment appears to become protective against HIV [11, 16]. Higher education levels attainment has been associated with decreased risk of HIV infection especially among younger people in Ethiopia, Zambia, Uganda and Tanzania [10, 23-25]. This association has been attributed, in part to increased awareness, adoption of safe behavioral practices and prompt access to preventive and curative health services by the more educated individuals [13]. Several existing evidence in support of the positive impact of education on better health outcomes are available [11, 14, 16, 26, 27], most of them suggest that education attainment imparts similar influences on HIV burden, reduced child mortality and increased survival.

Little is known about the effect of head of households' socio-economic (SES) on HIV prevalence of their children in Tanzania. It is important that this relationship is investigated in order to understand factors influencing paediatric HIV. This study was therefore carried out to determine the relationship between household SES and HIV prevalence among under five-year children in Muheza district, Tanzania.

## Methods

### Study area and population

This facility-based study was carried out from June 2015 to June 2016 in Muheza district, in north-eastern Tanzania (4<sup>0</sup>, 45'S; 39<sup>00</sup>0'E). The study population involved mothers/guardians with their respective HIV exposed under five-year children. Using a multistage sampling approach, we enrolled a random sample of mother/guardian child pairs. More details of this study have been described elsewhere [28]. More than 79% of households in the district are involved in agriculture as the main source of livelihood and income. The remaining proportion include petty traders, fisherman and livestock keepers. The district has 116 primary schools and 31 secondary schools [29]. The district has a total of 46 health facilities which include one hospital, four health centers and 41 dispensaries.

### Data collection

Socio-demographic factors of the mother/guardian-child pairs (education, age, sex, marital status, distance from a health facility, occupation, residence; head of household (age, sex, education, size of household, proxy variables for household wealth) were collected using a structured questionnaire. The household's wealth was also assessed based on four key questions; namely primary house construction materials, main source of fuel used for cooking, ownership of land and presence/absence of electricity.

Information on the HIV status of the children was extracted from data-base available at the district hospital. Data on education level was based on the Tanzanian system whereby,

individuals attend 7 years of primary education, 4 years of secondary education (ordinary level), and 2 years of advanced secondary education. After ordinary secondary education or advanced secondary education, individuals meet criteria for college education or qualify for University education after advanced level of secondary education.

## **Data management and analysis**

Data analysis was performed using Stata software version 13. For the child HIV status was categorized into a binary outcome variable as “HIV positive” and “HIV negative”. Education level attainment was categorized into a binary outcome (‘low education’ or ‘high education’), measured as the number of formal school years attended by the respondent. Low education level was recorded as 0-6 years schooling and high education as 7+ years schooling. The household wealth was categorized into a binary variable ‘high’ or ‘low’. Size of the household was categorized into two: less or equal to seven people and more than seven people living in the same household. Multiple logistic regression was done by including variables from univariate analysis with P-value of  $\leq 0.2$ . Multiple logistic regression analyses were used to examine the associations between various socio-economic factors of the head of household and the child’s HIV infection status. Backward Logistic Regression method was employed by removing variables with highest P-value until the remaining variables in the final model had a P-values  $\leq 0.05$  and adjusted odd ratios (AOR) at 95% confidence interval. Crude odd ratios (COR) with corresponding P-values were also presented.

## Ethical considerations

Ethical approval was obtained from Medical Research Coordinating Committee of the National Institute for Medical Research in Tanzania with reference number NIMR/HQ/R.8a/Vol. IX/1978. Permission to conduct this study was granted by Muheza District Council Authority. Written informed consent was obtained from each mother/guardian before recruitment.

## Results

### Socio-demographic characteristics of the respondents

A total of 576 mothers/guardians each with HIV exposed under five-year child were interviewed. Out of 576 under five-year children, 281 (48.8%) were males and 295 (51.2%) were females. A total of 379 (65.8%) under five-year children were aged  $\leq 24$  months and 197 (34.2%) aged 25-59 months. More than half (n=309) of under five-year children were living far (more than 30 minutes walk by foot) from a health facility. A total of 61 under five-year children were confirmed to be HIV positive whereby 75.4% (46) of them, belonged to the head of households who had completed primary (7 years) level of education (Figure 1). The education level of the heads of household were: 58 (10.1%) had less than 7 years of education, 518 (89.9%) had 7+ years of education. Majority (82.1%, n=473) of the heads of household had completed primary (7 years) level education. Forty-two (7.3%), 3 (0.5%), had 8-11 years and 12+ years of schooling respectively. A total of 445 (73%) household heads were living in rural areas. Households with low wealth were 441 (77%) and those with high wealth were 135 (23%).

### Figure 1:

# **Socio-economic factors associated with HIV infection among under-five year children**

In multiple logistic regression, higher odds of HIV infection was observed among children aged more than two years (AOR=3.0, 95% CI 1.5-5.9) than in younger children. Likewise, higher likelihood of HIV infection was 2.4 (AOR= 2.4 (1.2-5.0) times higher among those who lived far from a health facility as compared to their counterparts. The odds of HIV infection in children was lower (AOR= 0.4, 95% CI 0.2-0.8) among those with a head of household who had attained high education level and in those living in households with high wealth (AOR = 0.5, 95% CI 0.2-0.9) (Table 1). At univariate analysis, the odds of HIV infection was 3 times higher among children living in rural areas than urban areas. Guardian's marital status, occupation and education did not show any association with HIV infection among under five-year children.

**Table 1: Household's socio-economic factors associated with HIV infection among under five-year children**

| Variables                   | Proportion (%) | COR<br>(95% CI) | \$P value | AOR<br>(95%CI) | *P value |
|-----------------------------|----------------|-----------------|-----------|----------------|----------|
| Child age (months)          |                |                 |           |                |          |
| ≤24                         | 65.8           | 1               |           | 1              |          |
| 25-59                       | 34.2           | 5.1 (2.9-9.1)   | < 0.001   | 3.0 (1.5-5.9)  | 0.002    |
| Residence                   |                |                 |           |                |          |
| Urban                       | 22.7           | 1               |           | 1              |          |
| Rural                       | 77.3           | 2.9 (1.2-7.0)   | 0.02      | 1.5 (0.6-4.0)  | 0.4      |
| Distance to health facility |                |                 |           |                |          |



|                             |      |               |           |               |      |
|-----------------------------|------|---------------|-----------|---------------|------|
| Near ( $\leq 30$ minutes)   | 46.4 | 1             |           | 1             |      |
| Far ( $> 30$ minutes)       | 53.6 | 3.2 (1.7-6.0) | $< 0.001$ | 2.4 (1.2-5.0) | 0.02 |
| Head of household education |      |               |           |               |      |
| Low (0-6 years schooling)   | 10.1 | 1             |           | 1             |      |
| High (7+ years schooling)   | 89.9 | 0.5 (0.3-1.1) | 0.08      | 0.4 (0.2-0.8) | 0.02 |
| Household wealth            |      |               |           |               |      |
| Low                         | 77   | 1             |           | 1             |      |
| High                        | 23   | 0.8 (0.4-1.6) | 0.2       | 0.5 (0.2-0.9) | 0.03 |

**Notes:** (a) Total sample size, N = 576 (b) \*P values of AOR; §P values of COR (c) COR = Crude odd ratio; AOR = Adjusted odd ratio; CI = Confidence interval

### Head of household's education

Results of the multiple logistic regression model showed significant association between level of education, and gender, size of the household, wealth. Males who were heads of household (AOR =2.0, 95% CI 1.1-3.5) had high education level attainment compared to their counterpart females. The households with high wealth were significantly associated with high education level of the heads of household (AOR =1.5, 95% CI 1.3-2.0). Heads of household living in rural areas (AOR=0.3 95% CI 0.1-0.9) had low education level compared to those living in urban areas. In the household with more than seven people living in the same house (AOR=0.5, 95% CI 0.2-0.9), was significantly associated with low education level of the head of household (Table 2).

**Table 2: Factors associated with high education level attainment of the heads of household**

| Variables             | Proportion (%) | COR<br>(95%CI) | \$P value | AOR<br>(95%CI) | *P value |
|-----------------------|----------------|----------------|-----------|----------------|----------|
| Head of household sex |                |                |           |                |          |
| Female                | 29.9           | 1              |           | 1              |          |
| Male                  | 70.1           | 2.2 (1.3-3.9)  | 0.004     | 2.0 (1.1-3.5)  | 0.02     |
| Residence             |                |                |           |                |          |
| Urban                 | 22.7           | 1              |           | 1              |          |
| Rural                 | 77.3           | 0.2 (0.1-0.6)  | 0.01      | 0.3 (0.1-0.9)  | 0.03     |
| Size of household     |                |                |           |                |          |
| ≤ 7 people            | 90.1           | 1              |           | 1              |          |
| > 7 people            | 9.9            | 0.4 (0.2-0.7)  | 0.01      | 0.5 (0.2-0.9)  | 0.04     |
| Household wealth      |                |                |           |                |          |
| Low                   | 77             | 1              |           | 1              |          |
| High                  | 23             | 1.4 (1.3-1.8)  | 0.01      | 1.5 (1.3-2.0)  | 0.02     |

**Notes:** (a) Total sample size, N = 576 (b) \*P values of AOR; \$P values of COR (c) COR = Crude odd ratio; AOR = Adjusted odd ratio; CI = Confidence interval

## Discussion

Our findings indicate that high education level of the heads of household and high household wealth have higher probability of reduced odds of HIV infection among under five-year children.

The likelihood of acquiring HIV infection is higher among under five-year children located in rural than in urban areas. Households with higher wealth were significantly associated with high education attainment of the heads of household. Moreover, the heads of household located in rural areas had low education level attainment compared to those in urban areas.

Education is one of the most important component of social and economic development [30]. Education has positive spill-over effects whereby all people in the society will benefit even if only few of them have received education [13]. The observed reduction on the likelihood of HIV infection among under five-year children in the households with heads with higher education level in this study could be due to adoption of preventive strategies on HIV/AIDS among higher educated individuals [13]. A study in Zambia has reported that the number of years one spent in school have an impact on the knowledge and ability to follow prevention strategies against HIV/AIDS transmission, that influence better health outcomes and child survival in the community [11, 16, 31]. The assumption that effects of educational attainment of the head of household on the likelihood of acquiring of HIV infection in children is likely to be exerted through mediator factors such as the power of decision to send the child to clinic to access interventions [32, 33]. It has been argued that, a set of proximate determinants can be influenced by changes in socio-economic determinants or by interventions which have a direct effect on biological mechanisms to influence the risk of morbidity and mortality among children (34). This implies that educational attainment in itself cannot, however, be isolated from other socio-economic factors as the grounds of HIV risk reduction.

Moreover, levels of knowledge, literacy and education tend to be lower among the poor and individuals living in rural areas which greatly influence household decisions with regard to the proximate determinants of health [18, 35]. However, educational opportunities might be quite limited in rural areas with poor road infrastructures that make the formal school system difficult to enter. A previous study in Tanzania, demonstrated increased HIV prevalence in rural population with less educated individuals at an increased risks [10]. Studies conducted in Sub Saharan Africa have reported that children living in rural areas are more prone to home deliveries that predispose them to HIV infection [36-38]. This could be attributed to inaccessibility to health promotion messages regarding HIV/AIDS prevention in rural compared to urban settings or women's participation in household decision making to access health related information and services in those male-headed household.

Higher educational achievement associated with higher household wealth observed in this study has also been reported elsewhere [14, 35, 39]. More-educated individuals are most likely to have more income and thus more control over their living [9]. They are likely to place higher value on future endeavors and thus be more motivated to adopt preventative measures particularly against infectious disease risks [40]. In addition, the interaction effects between education and wealth could be very positive; when individuals have resources and the ability to use those resources, they can act on safeguarding their health seeking behavioral patterns [41]. This suggest that a convincing interaction do exist between wealth and education, as well as between education and the risk of acquiring diseases among family members living in the same household. Moreover, higher income at household level is interrelated with higher educational attainment and better health outcomes which is attributed, in part to more frequent and more intensive use of health

services at both private and public health sectors [42]. A recent study in South Africa reported decreased risk of HIV infection among individuals living in less poor household and having tertiary education [43]. This indicates that strategies that enhance economic empowerment and provision of quality education to every individuals is highly recommended in order to bring positive health outcomes in the society.

The study has limitations including the possibility that our results could have been affected by unmeasured confounders, which cannot be eliminated. Since some variables may not fully be adjusted during analysis, especially when dealing with proxy variables for household wealth which might be subjected to misclassification. Selection bias, as only those who have attended at the health facility got higher chance to be selected. These individuals may differ from those who were left to be unidentified in the community.

## Conclusion

High educational level attainment of the heads of household and high household wealth was associated with reduced likelihood of acquiring HIV infection among under five-year children living in the same household. Under five-year children located in rural areas had increased likelihood of acquiring HIV infection than their counterparts in urban areas. Thus, there is a need to focus on improving education and general knowledge to the whole population and economically disadvantaged populations as complementary strategies in HIV/AIDS control and prevention programmes.

## Authors' contributions

VMB conceived the study. VMB, CCM, LEGM, SGM, ES contributed to the design of the approach. VMB analysed and interpreted the data. VMB wrote the manuscript and all authors read, contributed to, and approved the final version of the manuscript.

## Acknowledgments

We would like to acknowledge the entire administration of Muheza District Council for granting permission to to conduct this study. Thanks to Juma Mfanga, Dorothy Lema, Angelina Sengwaji, Paulo Muhusa, Herieth Nyangasa, John Kwingwa, Baltazar Nyombi, and staff of the Muheza Designated District Hospital, health centres and dispensaries for their extended cooperation during data collection. We would like to acknowledge the excellent technical and field assistance of Bernadina Ruta, Stella Kolugendo, Josephine Mhina, Irene Lazaro, Grades Stanley, Susan F. Rumisha, Fagason Mduma, Veronica Msingwa and Diana Kwetukia. Many thanks to all children and their families who agreed to participate in this study.

## References

1. Parker R. The global HIV/AIDS pandemic, structural inequalities, and the politics of international health. *American journal of public health*. 2002;92(3):343-7.

2. UNAIDS. Joint United Nations Programme on HIV/AIDS. UNAIDS data 2017. Geneva, Switzerland. UNAIDS,2017. Available from: [http://www.unaids.org/sites/default/files/media\\_asset/20170720\\_Data\\_book\\_2017\\_en.pdf](http://www.unaids.org/sites/default/files/media_asset/20170720_Data_book_2017_en.pdf)
3. World Health Organization. Global Health Observatory data. Number of people (all ages) living with HIV Estimates by country. Geneva, Switzerland, 2017. World Health Organization.. Available from: <https://www.who.int/gho/en/>
4. Leroy V, Karon JM, Alioum A, Ekpin ER, Meda N, Greenberg AE, et al. Twenty-four month efficacy of a maternal short-course zidovudine regimen to prevent mother-to-child transmission of HIV-1 in West Africa. *Aids*. 2002;16(4):631-41.
5. Mock PA, Shaffer N, Bhadrakom C, Siriwasin W, Chotpitayasunondh T, Chearskul S, et al. Maternal viral load and timing of mother-to-child HIV transmission, Bangkok, Thailand. *AIDS*. 1999;13(3):407-14.
6. Davis K, Blake J. Social structure and fertility: An analytic framework. *Economic development and cultural change*. 1956;4(3):211-35.
7. Bwana VM, Frimpong C, Simulundu E, Mfinanga SG, Mboera LE, Michelo C. Accessibility of services for early infant diagnosis of Human Immunodeficiency Virus in sub-Saharan Africa: a systematic review. *Tanzania journal of health research*. 2016;18(3).
8. Johnson LF, Dorington RE, Bradshaw D, du Plessis H, Makubalo L. The effect of educational attainment and other factors on HIV risk in South African women: results from antenatal surveillance, 2000–2005. *Aids*. 2009;23(12):1583-8.
9. Joint United Nations Programme on HIV/AIDS. Report on the Global HIV/AIDS Epidemic June 1998. Geneva, Switzerland. UNAIDS, 1998. Available from: [http://data.unaids.org/pub/report/1998/19981125\\_global\\_epidemic\\_report\\_en.pdf](http://data.unaids.org/pub/report/1998/19981125_global_epidemic_report_en.pdf)

10. Mmbaga EJ, Leyna GH, Mnyika KS, Hussain A, Klepp K-I. Education attainment and the risk of HIV-1 infections in rural Kilimanjaro Region of Tanzania, 1991–2005: a reversed association. *Sexually transmitted diseases*. 2007;34(12):947-53.
11. De Walque D, Nakiyingi-Miiro JS, Busingye J, Whitworth JA. Changing association between schooling levels and HIV-1 infection over 11 years in a rural population cohort in south-west Uganda. *Tropical Medicine & International Health*. 2005;10(10):993-1001.
12. Gillespie S, Kadiyala S, Greener R. Is poverty or wealth driving HIV transmission? *Aids*. 2007;21:S5-S16.
13. Hargreaves JR, Bonell CP, Boler T, Boccia D, Birdthistle I, Fletcher A, et al. Systematic review exploring time trends in the association between educational attainment and risk of HIV infection in sub-Saharan Africa. *Aids*. 2008;22(3):403-14.
14. Wagstaff A. Poverty and health sector inequalities. *Bulletin of the World Health Organization*. 2002;80:97-105.
15. Bunyasi EW, Coetzee DJ. Relationship between socioeconomic status and HIV infection: findings from a survey in the Free State and Western Cape Provinces of South Africa. *BMJ open*. 2017;7(11):e016232.
16. Michelo C, Sandøy IF, Fylkesnes K. Marked HIV prevalence declines in higher educated young people: evidence from population-based surveys (1995–2003) in Zambia. *AIDS*. 2006;20(7):1031-8.
17. Joint United Nations Programme on HIV/AIDS. Transactional sex and HIV risk: from analysis to action. Geneva, Switzerland, 2018. Joint United Nations Programme on HIV/AIDS and STRIVE. Available from:



[http://www.unaids.org/sites/default/files/media\\_asset/transactional-sex-and-hiv-risk\\_en.pdf](http://www.unaids.org/sites/default/files/media_asset/transactional-sex-and-hiv-risk_en.pdf).

18. Bruns B, Mingat A, Rakotomalala R. Achieving universal primary education by 2015: A chance for every child, The World Bank, Washington, D.C., USA, 2003. Available from...
19. Joint United Nations Programme on HIV/AIDS. AIDS and SDGs. The AIDS response in the 2030 agenda for sustainable development: joint work, shared gains. HIV and the SDGs: joint action, shared progress. Geneva, Switzerland, 2018. Joint United Nations Programme on HIV/AIDS. Available from: [http://www.unaids.org/en/AIDS\\_SDGs](http://www.unaids.org/en/AIDS_SDGs).
20. Ministry of Health and Social Welfare. The United Republic of Tanzania, National AIDS control Program, National guidelines for the management of HIV and AIDS, 2015. Ministry of Health and Social Welfare, Dar es Salaam, Tanzania.
21. Ministry of Health. The republic of Uganda. Consolidated Guidelines for Prevention and Treatment Of HIV in Uganda, Ministry of Health, Kampala, Uganda 2016.
22. Ministry of Health and National AIDS Control Council: MOH:NACC. Kenya AIDS response progress report 2016. Nairobi, Kenya.
23. Bradley H, Bedada A, Brahmbhatt H, Kidanu A, Gillespie D, Tsui A. Educational attainment and HIV status among Ethiopian voluntary counseling and testing clients. AIDS and Behavior. 2007;11(5):736-42.
24. Fylkesnes K, Musonda RM, Kasumba K, Ndhlovu Z, Mluanda F, Kaetano L, et al. The HIV epidemic in Zambia: socio-demographic prevalence patterns and indications of trends among childbearing women. Aids. 1997;11(3):339-45.

25. Kilian AH, Gregson S, Ndyabangi B, Walusaga K, Kipp W, Sahlmüller G, et al. Reductions in risk behaviour provide the most consistent explanation for declining HIV-1 prevalence in Uganda. *Aids*. 1999;13(3):391-8.
26. Choudhury PK. Explaining the Role of Parental Education in the Regional Variations in Infant Mortality in India. *Asia & the Pacific Policy Studies*. 2015;2(3):544-72.
27. Fuchs R, Pamuk E, Lutz W. Education or wealth: which matters more for reducing child mortality in developing countries? *Vienna Yearbook of Population Research*. 2010;8:175-99.
28. Bwana VM, Mfinanga SG, Simulundu E, Mboera LEG, Michelo C. Accessibility of Early Infant Diagnostic Services by Under-5 Years and HIV Exposed Children in Muheza District, North-East Tanzania. *Front Public Health* 2018;6:139. doi: 10.3389/fpubh.2018.00139.
29. Muheza District Council, Annual Primary Health Care (PHC) Report, Muheza, Tanzania, January – December 2017.
30. Wabiri N, Taffa N. Socio-economic inequality and HIV in South Africa. *BMC public health*. 2013;13(1):1037. <https://doi.org/10.1186/1471-2458-13-1037>.
31. De Neve J-W, Fink G, Subramanian S, Moyo S, Bor J. Length of secondary schooling and risk of HIV infection in Botswana: evidence from a natural experiment. *The Lancet Global Health*. 2015;3(8):e470-e7. doi: 10.1016/S2214-109X(15)00087-X.
32. Boerma JT, Weir SS. Integrating Demographic and Epidemiological Approaches to Research on HIV/AIDS: The Proximate-Determinants Framework. *The Journal of Infectious Diseases*. 2005;191(Supplement\_1):S61-S7.

33. Hargreaves JR, Glynn JR. Educational attainment and HIV-1 infection in developing countries: a systematic review. *Tropical Medicine & International Health*. 2002;7(6):489-98.
34. Mosley WH, Chen LC. An analytical framework for the study of child survival in developing countries. *Population and development review*. 1984;10:25-45.
35. Filmer D, Pritchett L. The effect of household wealth on educational attainment: evidence from 35 countries. *Population and development review*. 1999;25(1):85-120.
36. Koye DN, Zeleke BM. Mother-to-child transmission of HIV and its predictors among HIV-exposed infants at a PMTCT clinic in northwest Ethiopia. *BMC public health*. 2013;13(1):398. <https://doi.org/10.1186/1471-2458-13-398>.
37. Mwendo EM, Mtuy TB, Renju J, Rutherford GW, Nondi J, Sichalwe AW, et al. Effectiveness of prevention of mother-to-child HIV transmission programmes in Kilimanjaro region, northern Tanzania. *Tropical Medicine & International Health*. 2014;19(3):267-74.
38. Ruton H, Mugwaneza P, Shema N, Lyambabaje A, de Dieu Bizimana J, Tsague L, et al. HIV-free survival among nine-to 24-month-old children born to HIV-positive mothers in the Rwandan national PMTCT programme: a community-based household survey. *Journal of the International AIDS Society*. 2012;15(1):4. doi: [10.1186/1758-2652-15-4](https://doi.org/10.1186/1758-2652-15-4).
39. Sianesi B, Reenen JV. The returns to education: Macroeconomics. *Journal of economic surveys*. 2003;17(2):157-200. <https://doi.org/10.1111/1467-6419.00192>.
40. Jukes M, Simmons S, Bundy D. Education and vulnerability: the role of schools in protecting young women and girls from HIV in southern Africa. *Aids*. 2008;22:S41-S56. doi: 10.1097/01.aids.0000341776.71253.04.

41. Dinkelman T, Lam D, Leibbrandt M. Household and community income, economic shocks and risky sexual behavior of young adults: evidence from the Cape Area Panel Study 2002 and 2005. AIDS. 2007;21(Suppl 7):S49. <https://dx.doi.org/10.1097%2F01.aids.0000300535.05226.a9>.
42. Castro-Leal F, Dayton J, Demery L. Public spending on health care in Africa: do the poor benefit? Bulletin of the World Health Organization. 2000;78, 66-74.
43. Mabaso M, Sokhela Z, Mohlabane N, Chibi B, Zuma K, Simbayi L. Determinants of HIV infection among adolescent girls and young women aged 15–24 years in South Africa: a 2012 population-based national household survey. BMC public health. 2018; 18(1):183. doi: [10.1186/s12889-018-5051-3](https://doi.org/10.1186/s12889-018-5051-3).

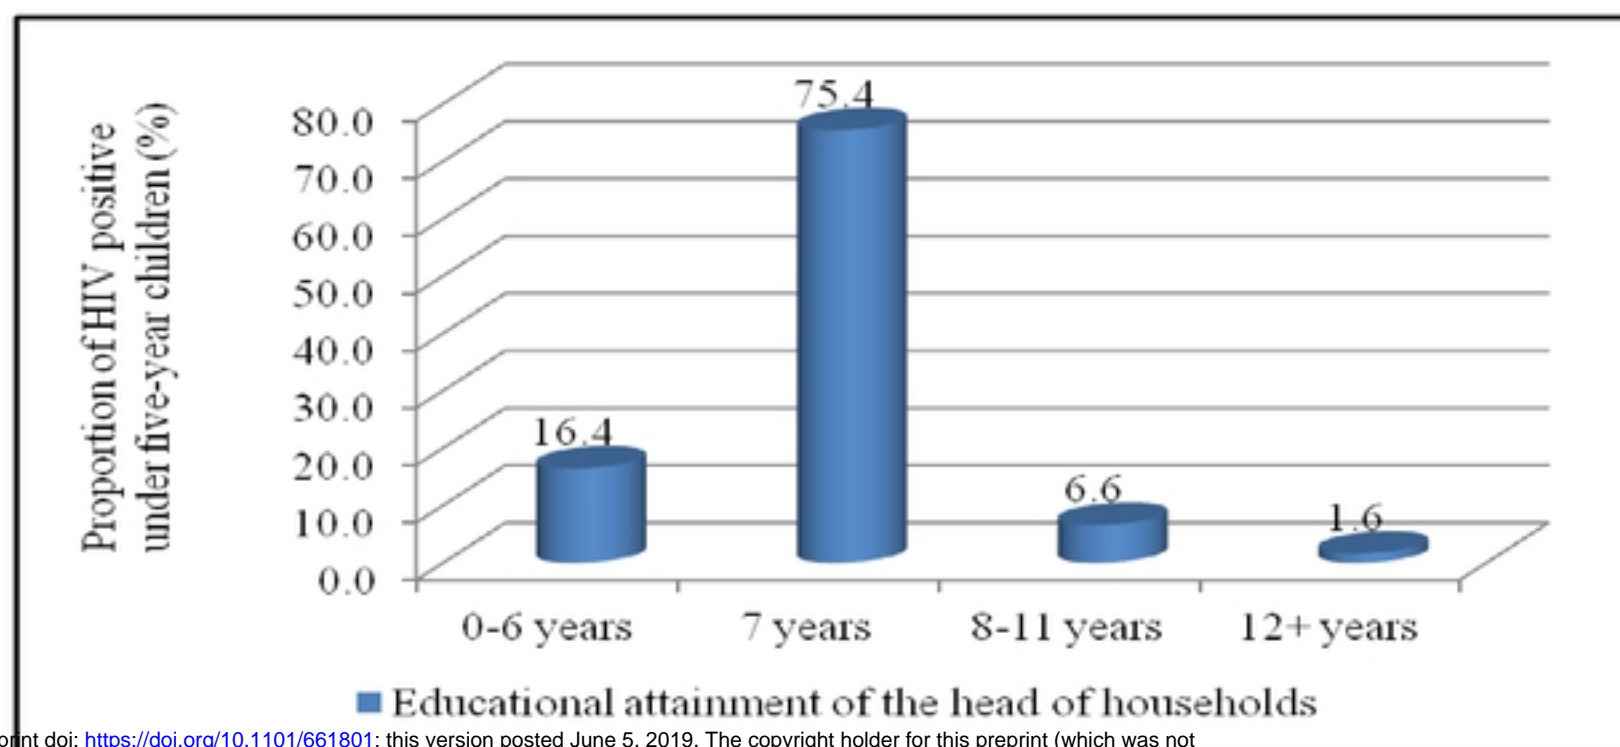

bioRxiv preprint doi: <https://doi.org/10.1101/661801>; this version posted June 5, 2019. The copyright holder for this preprint (which was not certified by peer review) is the author/funder, who has granted bioRxiv a license to display the preprint in perpetuity. It is made available under aCC-BY 4.0 International license.

**Figure 1: Proportion of HIV positive under five-year children by educational attainment of their head of households**
